# Supplementary material for: MSA-Regularized Protein Sequence Transformer toward Predicting Genome-Wide Chemical-Protein Interactions: Application to GPCRome Deorphanization
Source: PubMed Central journal article supplement — J Chem Inf Model. 2021 Mar 23;61(4):1570–82. doi: 10.1021/acs.jcim.0c01285 (PMC8154251; doi:10.1021/acs.jcim.0c01285), 2021-03-23
Supplement: ci0c01285_si_001.pdf [file ci0c01285_si_001.pdf]

Supporting Information

**MSA-Regularized Protein Sequence Transformer  
Toward Predicting Genome-Wide Chemical-Protein  
Interactions: Application to GPCRome  
Deorphanization**

Tian Cai<sup>1</sup>, Hansaim Lim<sup>2</sup>, Kyra Alyssa Abbu<sup>3</sup>, Yue Qiu<sup>4</sup>, Ruth Nussinov<sup>5,6</sup>, Lei Xie<sup>1,2,3,4,7,\*</sup>

*<sup>1</sup>Ph.D. Program in Computer Science, The Graduate Center, The City University of New York,  
New York, 10016, USA*

*<sup>2</sup>Ph.D. Program in Biochemistry, The Graduate Center, The City University of New York, New  
York, 10016, USA*

*<sup>3</sup>Department of Computer Science, Hunter College, The City University of New York, New York,  
10065, USA*

*<sup>4</sup>Ph.D. Program in Biology, The Graduate Center, The City University of New York, New York,  
10016, USA*

*<sup>5</sup>Computational Structural Biology Section, Basic Science Program, Frederick National  
Laboratory for Cancer Research, Frederick, MD 21702, USA*

*<sup>6</sup>Department of Human Molecular Genetics and Biochemistry, Sackler School of Medicine, Tel  
Aviv University, Tel Aviv, 69978, Israel*

<sup>7</sup>*Helen and Robert Appel Alzheimer's Disease Research Institute, Feil Family Brain & Mind  
Research Institute, Weill Cornell Medicine, Cornell University, New York, 10021, USA*

*\*Corresponding Author: Lei Xie, Address: 1008N 695 Park Avenue, New York City, NY 10065,  
USA, Phone:212-396-6550 , Email: [lei.xie@hunter.cuny.edu](mailto:lei.xie@hunter.cuny.edu)*

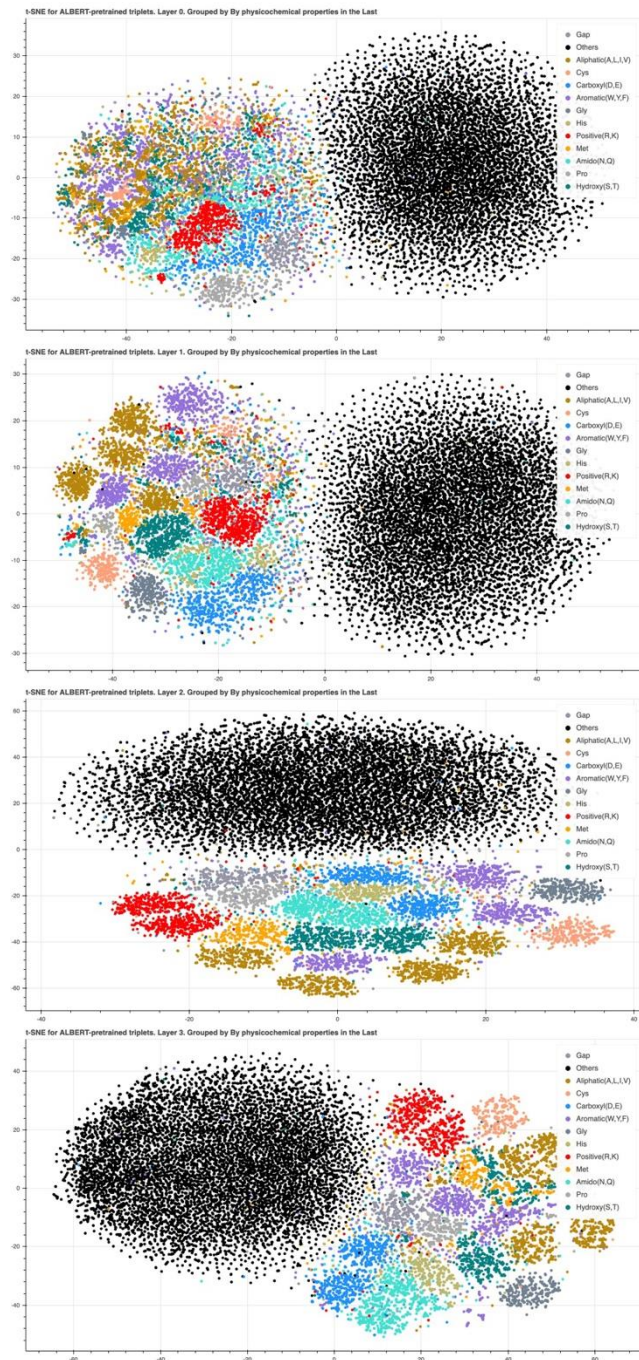

Figure S1: Clustering of pre-trained triplet DISAE vectors at (A) Level 1, (B) Level 2, (C) Level 3, and (D) Level 4 of ALBERT. The triplet is colored by the physicochemical properties of the third amino acid.

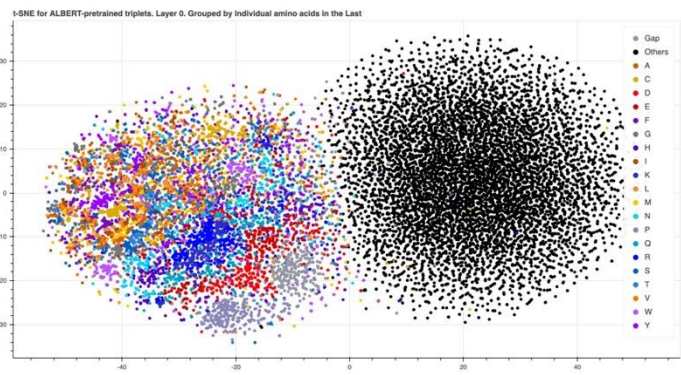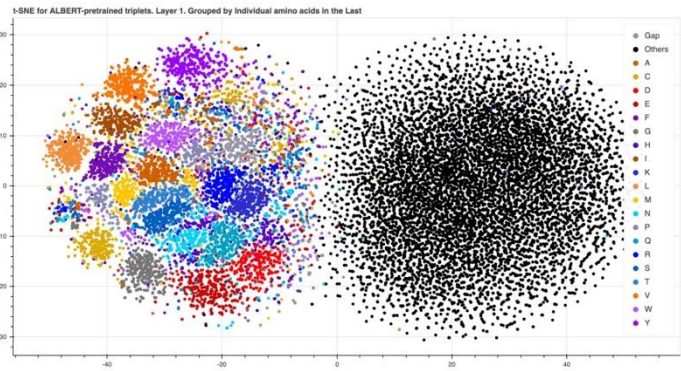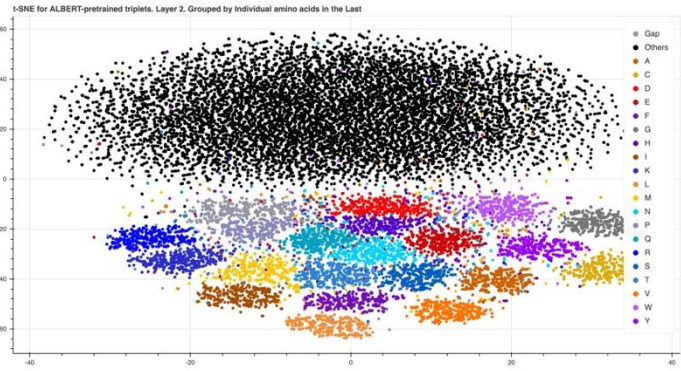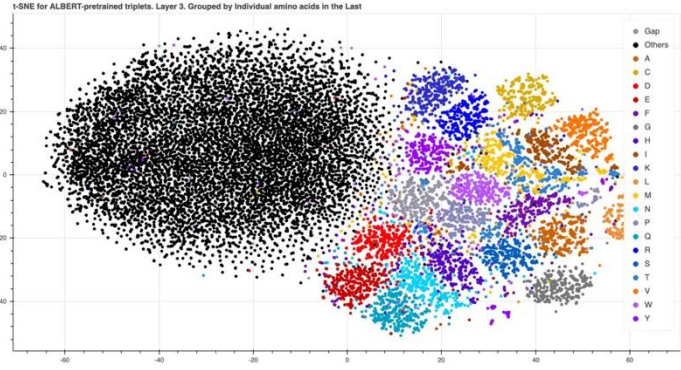

Figure S2: The same clustering trends as in Figure S1 were also observed when triplets are grouped by individual amino acid types, rather than their physicochemical properties of side chains.

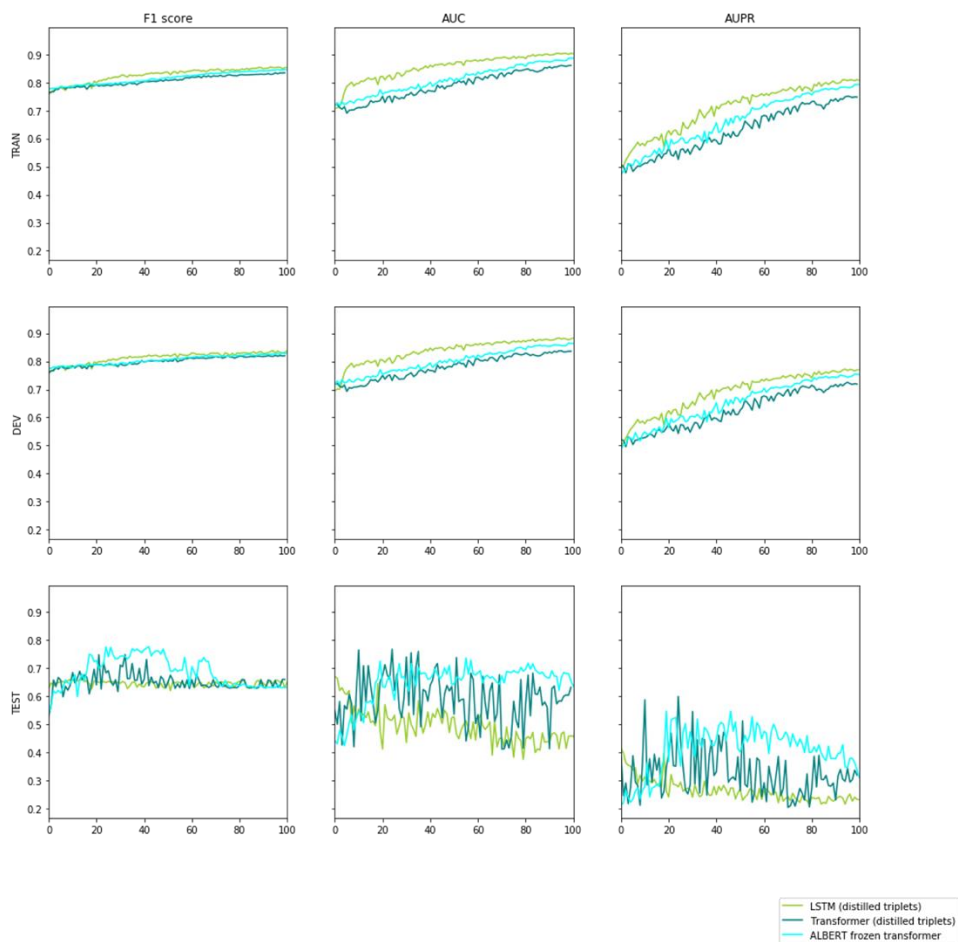

Figure S3: The three major models as in the AUC curves in the paper. All  $x$  axes are the number of epochs trained. ALBERT frozen transformer shows consistently better performance, which becomes the critical advantage of DISAE in deorphanization, where remote orphan proteins are significantly different from training data and overfitting is impossible to control given the unknown true labels for classification. Using DISAE, we could be confident that even if we train the model for too long or too short epochs, the prediction reliability on orphans will be robust.

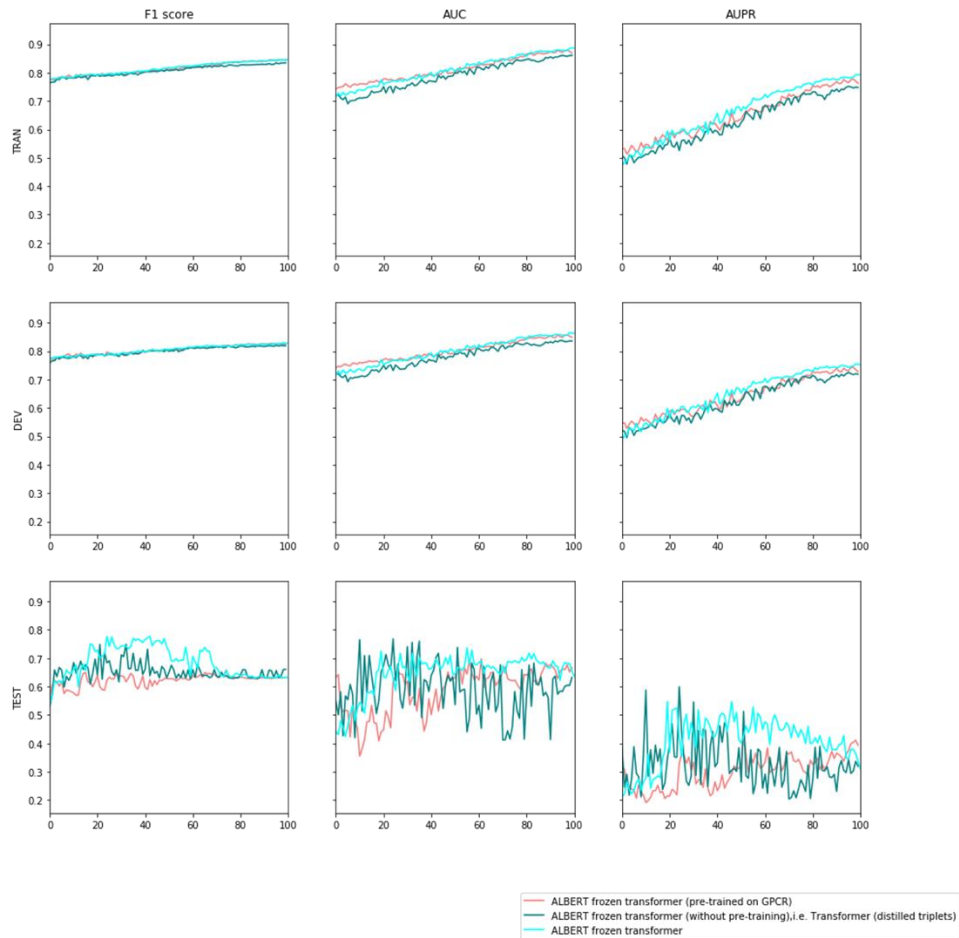

Figure S4: The effect of pre-training: ALBERT frozen transformer, i.e., the one pre-trained on whole pfams as proposed in DISAE, shows robust and consistent better performance. All  $x$  axes are the number of epochs trained.

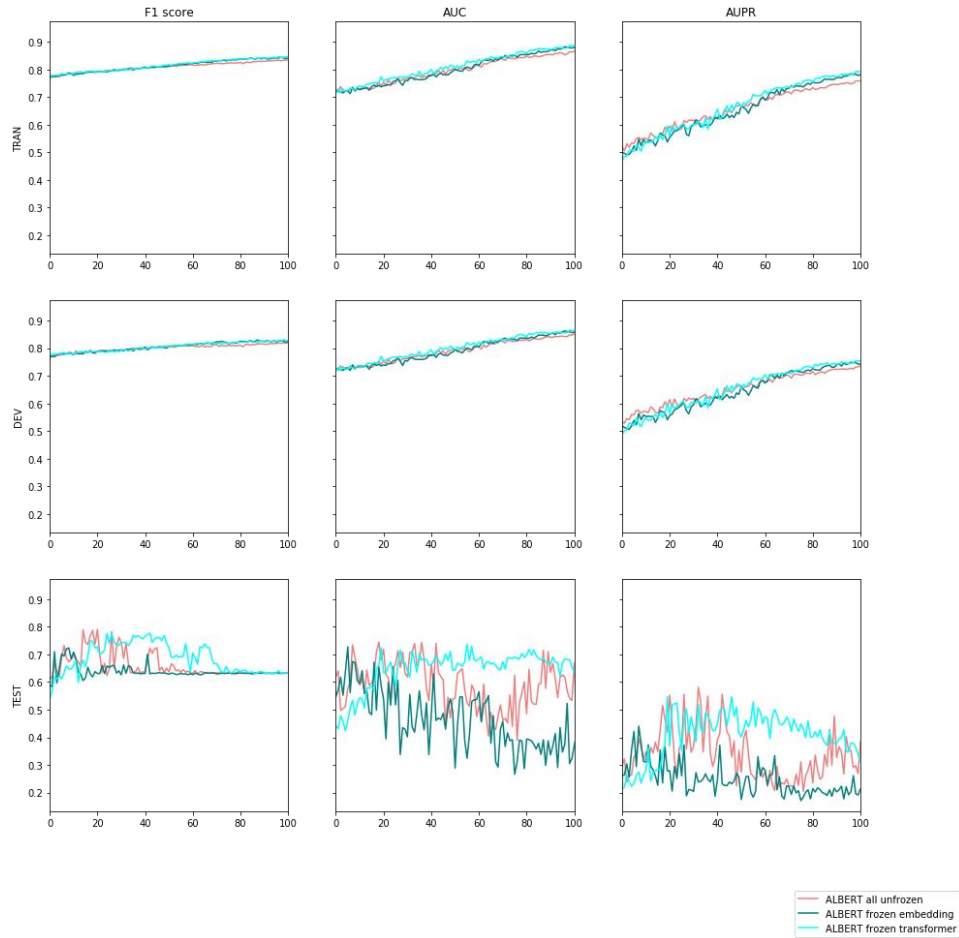

Figure S5: The effect of different fine-tuning strategy with freezing parts of ALBERT: Although the other setting could be as good as ALBERT frozen transformer in some epochs, but they all suffer from large performance variance by epoch. ALBERT frozen transformer proves consistent and robust high performance. All  $x$  axes are the number of epochs trained.

PF03402

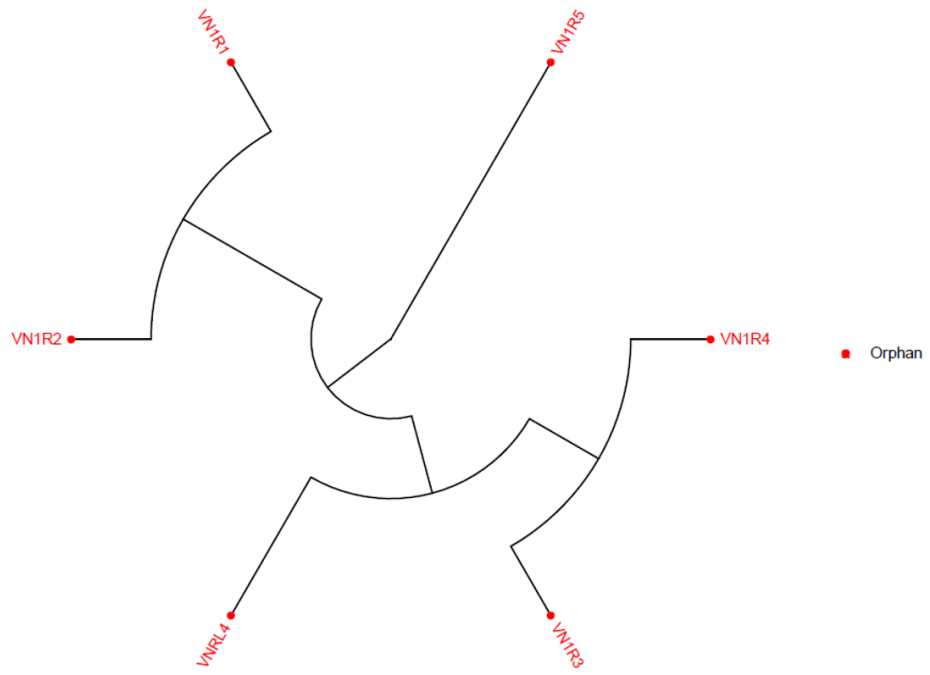

Figure S6: Phylogenetic tree for PF03402



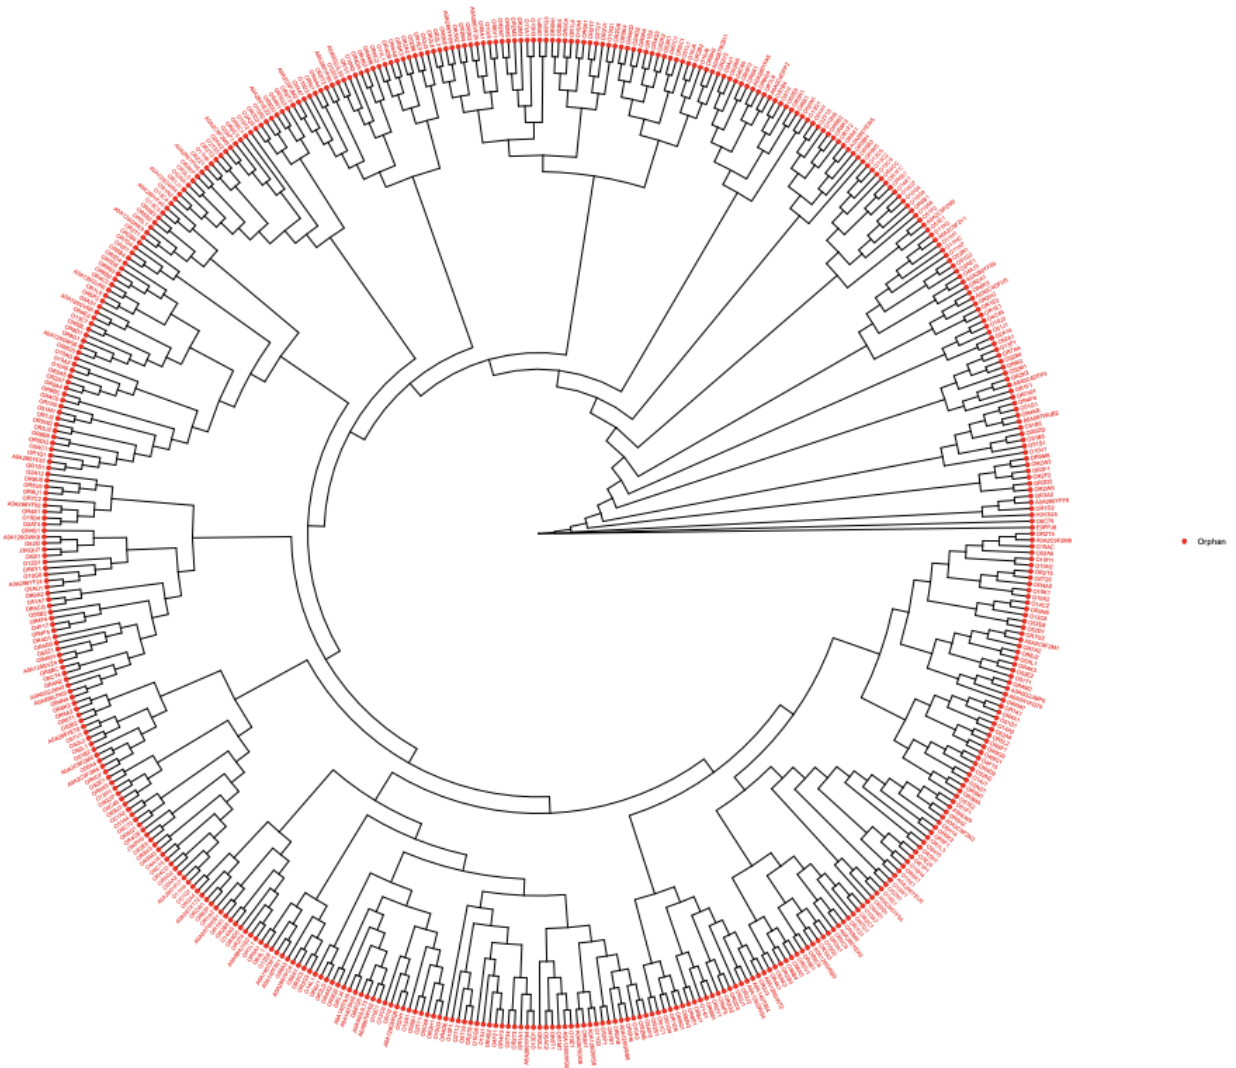

Figure S7: Phylogenetic tree for PF13853

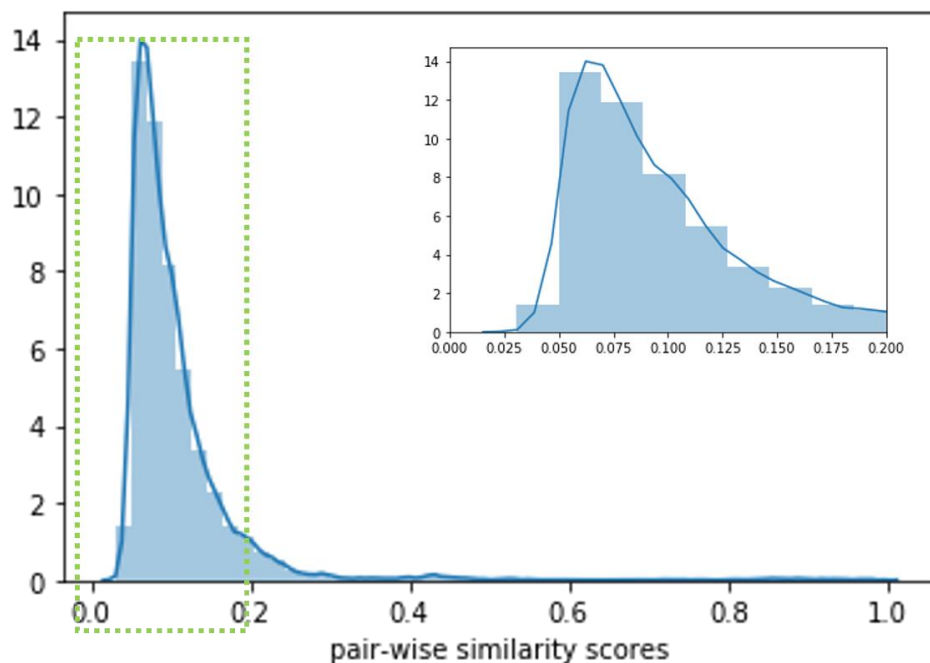

Figure S8: Protein pairwise similarity distribution of benchmark data: To simulate realistic deorphanization scenario, where remote orphan protein could be significantly different from data used to train models, we design a protein similarity-based data splitting strategy. First, pairwise bit-scores are calculated with standard BLAST+ package. A distribution could be found in Figure 8. Then, setting a threshold of 0.035, proteins with pairwise similarity lower than the threshold are keep separately in two groups. The protein-chemical activity pairs with protein in the relative smaller group will be used as testing data. The left samples are then split into training and validation.

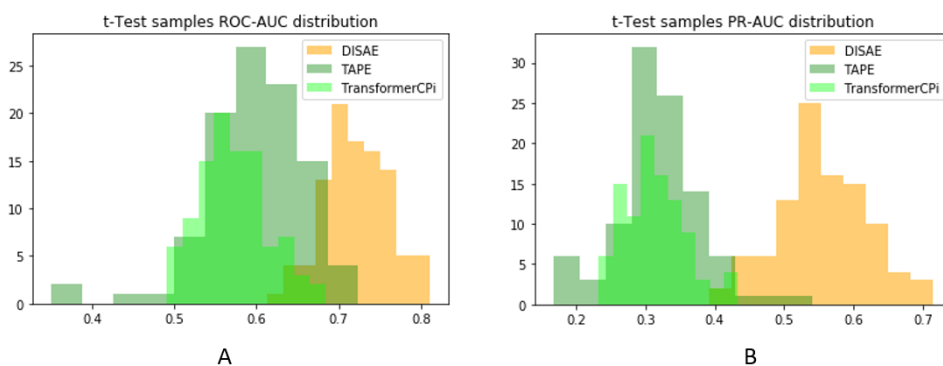

Figure 9: t-Test sample AUC distributions. The p-values of DISAE mean AUC scores against TAPE and TranformerCPI are close to 0.

| <b>Orphan Receptor</b> | <b>Predicted Drug [Known binding protein]</b>               |
|------------------------|-------------------------------------------------------------|
| A0A087WY02             | XXPANQJNYNUNES-UHFFFAOYSA-N ['P23975', 'Q05940', 'P31645']  |
| A0A0A0MQW8             | BYJAVTDNIXVSPW-UHFFFAOYSA-N ['Q96RJ0', 'P35348', 'P43140']  |
| A0A0B4J1V8             | RGCVKNLCSQQDEP-UHFFFAOYSA-N ['P33261', 'P18901', 'P08684']  |
| A0A0C4DFX5             | MBUVEWMHONZEQD-UHFFFAOYSA-N ['P11509', 'P33261', 'Q16873']  |
| A0A126GVR8             | BPZSYCZIITTYBL-YJYMSZOUSA-N ['P13945', 'P11509', 'P07550']  |
| A0A126GWK9             | VQODGRNSFPNSQE-DVTGEIKXSA-N ['P46721', 'P04083', 'P20309']  |
| A0A126GWS4             | VMWNQDUVQKEIOC-CYBMUJFWSA-N ['P18901', 'P08684', 'P50226']  |
| A0A1B0GTK7             | ATALOFNDEOCMKK-OITMNORJSA-N ['P29371', 'P11712', 'P33261']  |
| A0A1B0GVZ0             | OWQUZNMNMYNAXSL-UHFFFAOYSA-N ['Q01959', 'P31390', 'P35367'] |
| A0A286YF86             | BGDKAVGWHJFAGW-UHFFFAOYSA-N ['P08485', 'P20309', 'P17200']  |
| A0A286YF92             | IRSCQMHQWWYFCW-UHFFFAOYSA-N ['Q13255', 'Q96FL8']            |
| A0A286YFH6             | BUGYDGFZZOZRHP-UHFFFAOYSA-N ['O00591', 'P11509', 'Q96FL8']  |
| A0A2C9F2M5             | CYQFCXCEBYINGO-IAGOWNOFSAN ['P47746', 'P47936', 'P11712']   |
| A3KFT3                 | KKZJGLLVHKMTCM-UHFFFAOYSA-N ['Q16678', 'P33527']            |
| A6NFC9                 | BYJAVTDNIXVSPW-UHFFFAOYSA-N ['Q96RJ0', 'P35348', 'P43140']  |
| A6NH00                 | BGDKAVGWHJFAGW-UHFFFAOYSA-N ['P08485', 'P20309', 'P17200']  |
| A6NMS3                 | IYIKLHRQXLHMJQ-UHFFFAOYSA-N ['P11509', 'P07550', 'P51589']  |
| A6NMU1                 | BARDROPHSZEKOC-OITMNORJSA-N ['P08684', 'P11712', 'P25103']  |
| C9J1J7                 | YFGHCGITMMYXQAQ-LJQANCHMSA-N ['P20815', 'P11712', 'P05177'] |
| C9JQD8                 | LWAFSHPYPHEXKX-UHFFFAOYSA-N ['P10635', 'P07550', 'P08588']  |
| C9JW47                 | BYBLEWFAAKGYCD-UHFFFAOYSA-N ['Q6PIU1', 'P22001', 'P33261']  |
| E7ENI1                 | OCJYIGYOJCODJL-UHFFFAOYSA-N ['P10635', 'P02768', 'P35367']  |
| E9PH76                 | ZSCDBOWYZJWBIY-UHFFFAOYSA-N ['P07550', 'P33261', 'P11229']  |
| E9PPJ8                 | OZYUPQUCAUTOBP-QXAKKESOSA-N ['P33535', 'P35372']            |
| F8VUV1                 | CYQFCXCEBYINGO-IAGOWNOFSAN ['P47746', 'P47936', 'P11712']   |
| G3V4Q5                 | XXPANQJNYNUNES-UHFFFAOYSA-N ['P23975', 'Q05940', 'P31645']  |
| H0Y622                 | UCHDWCVPSPXUMX-TZIWLTVJSA-N ['P11509', 'P07550', 'P21452']  |
| J3KQU7                 | IZTQOLKUZKXIRV-YRVFCXMDSA-N ['Q9NPD5', 'P30553', 'Q63931']  |
| O00590                 | JOATXPAWOHTVSZ-UHFFFAOYSA-N ['P13945', 'P07550', 'P18089']  |
| O15218                 | BYJAVTDNIXVSPW-UHFFFAOYSA-N ['Q96RJ0', 'P35348', 'P43140']  |
| O43869                 | UCHDWCVPSPXUMX-TZIWLTVJSA-N ['P11509', 'P07550', 'P21452']  |
| O60431                 | XXPANQJNYNUNES-UHFFFAOYSA-N ['P23975', 'Q05940', 'P31645']  |
| O76099                 | SHGAZHPCJPHSC-YCNIQYBTTSA-N ['P31025', 'P11509', 'Q02928']  |
| P04000                 | LUZRJRNXALNLM-JGRZULCMSA-N ['P08684', 'P34969', 'P35462']   |
| P04001                 | XXPANQJNYNUNES-UHFFFAOYSA-N ['P23975', 'Q05940', 'P31645']  |
| P0C604                 | DGBIGWXXNGSACT-UHFFFAOYSA-N ['O00591', 'O14764', 'P48169']  |
| P0C628                 | HTIQEAQVCYTUBX-UHFFFAOYSA-N ['Q02641', 'P08684', 'P04798']  |
| P0C645                 | IRSCQMHQWWYFCW-UHFFFAOYSA-N ['Q13255', 'Q96FL8']            |
| P0C7N5                 | VMWNQDUVQKEIOC-CYBMUJFWSA-N ['P18901', 'P08684', 'P50226']  |
| P0DMS8                 | DGBIGWXXNGSACT-UHFFFAOYSA-N ['O00591', 'O14764', 'P48169']  |
| P0DN77                 | XXPANQJNYNUNES-UHFFFAOYSA-N ['P23975', 'Q05940', 'P31645']  |
| P0DN78                 | XXPANQJNYNUNES-UHFFFAOYSA-N ['P23975', 'Q05940', 'P31645']  |
| P47804                 | QWAXKHKRTORLEM-UGJKXSETSA-N ['P21452', 'P08684', 'P35462']  |
| P58173                 | VHYCDWMUTMEGQY-UHFFFAOYSA-N ['P13945', 'P07550', 'P08588']  |
| Q15612                 | OIRDTQYFTABQOQ-KQYNXXCUSA-N ['P29275', 'P55263', 'P25099']  |
| Q15617                 | ZSCDBOWYZJWBIY-UHFFFAOYSA-N ['P07550', 'P33261', 'P11229']  |

|        |                                                             |
|--------|-------------------------------------------------------------|
| Q6IFH4 | KWTSXDURSIMDCE-QMMMGPBSA-N ['P25100', 'Q8HZ64', 'P10635']   |
| Q7Z5H5 | IYIKLHRQXLHMQ-UHFFFAOYSA-N ['P11509', 'P07550', 'P51589']   |
| Q8N0Y5 | COUYJEVMBVSIHV-SFHVURJKSA-N ['P10632', 'P07550', 'P11712']  |
| Q8N6U8 | BYJAVTDNIXVSPW-UHFFFAOYSA-N ['Q96RJ0', 'P35348', 'P43140']  |
| Q8NG76 | IZTQOLKUZKXIRV-YRVFCXMDSA-N ['Q9NPD5', 'P30553', 'Q63931']  |
| Q8NG83 | CJOFXWAVKWHFT-XSFVSMFZSA-N ['Q9HB55', 'P22086', 'P10635']   |
| Q8NG85 | IYIKLHRQXLHMQ-UHFFFAOYSA-N ['P11509', 'P07550', 'P51589']   |
| Q8NGB2 | BARDROPHSZEKBC-OITMNORJSA-N ['P08684', 'P11712', 'P25103']  |
| Q8NGC2 | MEFKEPWMEQBLKI-AIRLBKTGSA-N ['P19623', 'P31153', 'P25099']  |
| Q8NGC8 | COUYJEVMBVSIHV-SFHVURJKSA-N ['P10632', 'P07550', 'P11712']  |
| Q8NGD3 | OCJYIGYOJCODJL-UHFFFAOYSA-N ['P10635', 'P02768', 'P35367']  |
| Q8NGD4 | UCTWMZQNUQWVSLP-VIFPVBQESA-N ['P07550', 'O15244', 'P08684'] |
| Q8NGE9 | WNTYBHLDCCKXEOT-UHFFFAOYSA-N ['P14416', 'P31388', 'P10275'] |
| Q8NGG2 | BGDKAVGWJHJFAGW-UHFFFAOYSA-N ['P08485', 'P20309', 'P17200'] |
| Q8NGI3 | CYQFCXCEBYINGO-IAGOWNOFSAN ['P47746', 'P47936', 'P11712']   |
| Q8NGI4 | IRSCQMHQWWYFCW-UHFFFAOYSA-N ['Q13255', 'Q96FL8']            |
| Q8NGI7 | OCJYIGYOJCODJL-UHFFFAOYSA-N ['P10635', 'P02768', 'P35367']  |
| Q8NGJ5 | JSWZEAMFRNKZNL-UHFFFAOYSA-N ['P11712', 'P41595', 'P05177']  |
| Q8NGJ9 | GEFQWZLICWMTKF-CDUCUWFYSA-N ['P25100', 'P18089', 'P08913']  |
| Q8NGK2 | LUZRJRNXALNLM-JGRZULCMSA-N ['P08684', 'P34969', 'P35462']   |
| Q8NGK6 | ZSCDBOWYZJWBIY-UHFFFAOYSA-N ['P07550', 'P33261', 'P11229']  |
| Q8NGL9 | UCHDWCPVSPXUMX-TZIWLTVJSA-N ['P11509', 'P07550', 'P21452']  |
| Q8NGM9 | BYJAVTDNIXVSPW-UHFFFAOYSA-N ['Q96RJ0', 'P35348', 'P43140']  |
| Q8NGN7 | XXPANQJNYNUNES-UHFFFAOYSA-N ['P23975', 'Q05940', 'P31645']  |
| Q8NGR4 | BGDKAVGWJHJFAGW-UHFFFAOYSA-N ['P08485', 'P20309', 'P17200'] |
| Q8NGS1 | XXPANQJNYNUNES-UHFFFAOYSA-N ['P23975', 'Q05940', 'P31645']  |
| Q8NGT5 | ATALOFNDEOCMKK-OITMNORJSA-N ['P29371', 'P11712', 'P33261']  |
| Q8NGU2 | UCHDWCPVSPXUMX-TZIWLTVJSA-N ['P11509', 'P07550', 'P21452']  |
| Q8NGW1 | DRHKJLXJIQTDTD-OAHLLOKOSA-N ['P08684', 'P34969', 'P35462']  |
| Q8NGX9 | URKOMYMAXPYINW-UHFFFAOYSA-N ['P31389', 'P07550', 'P33261']  |
| Q8NGY9 | UCTWMZQNUQWVSLP-VIFPVBQESA-N ['P07550', 'O15244', 'P08684'] |
| Q8NGZ2 | IZTQOLKUZKXIRV-YRVFCXMDSA-N ['Q9NPD5', 'P30553', 'Q63931']  |
| Q8NGZ4 | RUDATBOHQWOJDD-BSWAIDMHSA-N ['P52895', 'Q96RI1', 'P08684']  |
| Q8NH04 | BYBLEWFAAKGYCD-UHFFFAOYSA-N ['Q6PIU1', 'P22001', 'P33261']  |
| Q8NH05 | KKGQTZUTZRNORY-UHFFFAOYSA-N ['P21453', 'O95977', 'P43004']  |
| Q8NH41 | OZVBMTJYIDMWIL-AYFBDAFISA-N ['P07550', 'P08684', 'P34969']  |
| Q8NH48 | ZSCDBOWYZJWBIY-UHFFFAOYSA-N ['P07550', 'P33261', 'P11229']  |
| Q8NH51 | BUGYDGFZZOZRHP-UHFFFAOYSA-N ['O00591', 'P11509', 'Q96FL8']  |
| Q8NH57 | XXPANQJNYNUNES-UHFFFAOYSA-N ['P23975', 'Q05940', 'P31645']  |
| Q8NH61 | RUDATBOHQWOJDD-BSWAIDMHSA-N ['P52895', 'Q96RI1', 'P08684']  |
| Q8NH74 | BYJAVTDNIXVSPW-UHFFFAOYSA-N ['Q96RJ0', 'P35348', 'P43140']  |
| Q8NH87 | GJPICJJRGTNOD-UHFFFAOYSA-N ['P25101', 'P11712', 'O95342']   |
| Q8NH89 | ZSCDBOWYZJWBIY-UHFFFAOYSA-N ['P07550', 'P33261', 'P11229']  |
| Q8NH95 | DERZBLKQOCDDDDZ-JLHYYAGUSA-N ['P11509', 'O60840', 'P11229'] |
| Q8TCB6 | HTIQEAQVCYTUBX-UHFFFAOYSA-N ['Q02641', 'P08684', 'P04798']  |
| Q8TDV2 | XXPANQJNYNUNES-UHFFFAOYSA-N ['P23975', 'Q05940', 'P31645']  |
| Q8WZA6 | ZFXYFBGIUFBOJW-UHFFFAOYSA-N ['P29275', 'P25099', 'Q60614']  |
| Q96KK4 | XXPANQJNYNUNES-UHFFFAOYSA-N ['P23975', 'Q05940', 'P31645']  |
| Q96R54 | VMWNQDUVQKEIOC-CYBMUJFWSA-N ['P18901', 'P08684', 'P50226']  |

|         |                                                             |
|---------|-------------------------------------------------------------|
| Q96R67  | ZSCDBOWYZJWBIIY-UHFFFAOYSA-N ['P07550', 'P33261', 'P11229'] |
| Q9BZJ7  | UCHDWCPVSPXUMX-TZIWLTJVSA-N ['P11509', 'P07550', 'P21452']  |
| Q9BZJ8  | KWTSXDURSIMDCE-QMMMGPBSA-N ['P25100', 'Q8HZ64', 'P10635']   |
| Q9GZM6  | PVNIIMVLHYAWGP-UHFFFAOYSA-N ['P49019', 'Q15274', 'Q80Z39']  |
| Q9H1Y3  | FIVSJYGQAIEMOC-ZGNKEGEESA-N ['P10635', 'Q9UNQ0', 'P25103']  |
| Q9H210  | IYIKLHRQXLHMJQ-UHFFFAOYSA-N ['P11509', 'P07550', 'P51589']  |
| Q9H339  | IYIKLHRQXLHMJQ-UHFFFAOYSA-N ['P11509', 'P07550', 'P51589']  |
| Q9NZZP2 | IQVRBWUUXZMOPW-PKQBQFBSA-N ['P29275', 'Q96FL8', 'P25099']   |
| Q9UGF5  | GHOSNRGJFBJIB-UHFFFAOYSA-N ['P30556', 'P11712', 'P23219']   |
| Q9UGF6  | BTCSSZJGUNDROE-UHFFFAOYSA-N ['Q7Z2H8', 'Q9Z0U4', 'Q9UBS5']  |
| Q9UHM6  | BGDKAVGWJFAGW-UHFFFAOYSA-N ['P08485', 'P20309', 'P17200']   |

Table S1: Predicted approved drug examples: 649 human orphan GPCRs, each paired to 555 approved GPCR-targeted drugs as novel samples chemical-protein pairs. Listed here are 106 of the orphan proteins paired with at least one approved GPCR-targeted drug with estimated false positive rate lower than 0.05. Proteins are presented with UniProt ID and chemicals are presented with InChIKey.

|                      |                                           | ALBERT MODEL CONFIGURATION IN DISAE |              |
|----------------------|-------------------------------------------|-------------------------------------|--------------|
|                      |                                           | TRIPLETS FORM                       | SINGLET FORM |
| pre-training related | "attention_probs_dropout_prob"            | 0                                   |              |
|                      | "hidden_act": "gelu"                      | "gelu"                              |              |
|                      | "hidden_dropout_prob"                     | 0                                   |              |
|                      | "embedding_size"                          | 128                                 |              |
|                      | "hidden_size"                             | 312                                 |              |
|                      | "initializer_range"                       | 0.02                                |              |
|                      | "intermediate_size"                       | 1248                                |              |
|                      | "max_position_embeddings"                 | 512                                 |              |
|                      | "num_attention_heads"                     | 12                                  |              |
|                      | "num_hidden_layers"                       | 4                                   |              |
|                      | "num_hidden_groups"                       | 1                                   |              |
|                      | "net_structure_type"                      | 0                                   |              |
|                      | "gap_size"                                | 0                                   |              |
|                      | "num_memory_blocks"                       | 0                                   |              |
|                      | "inner_group_num"                         | 1                                   |              |
| "down_scale_factor"  | 1                                         |                                     |              |
| "type_vocab_size"    | 2                                         |                                     |              |
|                      | "vocab_size"                              | 19686                               | 32           |
|                      | "ln_type"                                 | /                                   | "postln"     |
| fine-tuning related  | sequence embedding hidden units           | 256                                 |              |
|                      | protein sequence post-tokenization length | 210                                 |              |
| TAPE                 | "num_hidden_layers"                       | 12                                  |              |
|                      | "hidden_size"                             | 768                                 |              |
|                      | "num_attention_heads"                     | 12                                  |              |

Table S2: ALBERT configuration. ALBERT is using the package *Transformers* by Huggingface (<https://github.com/huggingface/transformers>). The author installed the package in Jan 2020.

| Neural-fingerprint CONFIGURATION                   |                                                    |
|----------------------------------------------------|----------------------------------------------------|
| Dropout                                            | 0.1                                                |
| convolution layer size                             | 20                                                 |
| convolution layer number                           | 4                                                  |
| hidden units                                       | 128                                                |
| Atomic connectivity degrees for chemical molecules | [0,1,2,3,4,5]                                      |
| INTERACTION PREDICTION CONFIGURATION               |                                                    |
| design                                             | two linear layer with batch normalization and ReLU |
| attentive pooling drop out                         | 0.3                                                |
| attentive pooling hidden units                     | 64                                                 |
| LSTM CONFIGURATION                                 |                                                    |
| embedding hidden units                             | 128                                                |
| number of LSTM layers                              | 1                                                  |
| dropout                                            | 0.2                                                |

Table S3: There are three major components of the fine-tuning model architecture: ALBERT to extract protein embedding, Neural-fingerprint to extract chemical embedding, and interaction prediction layers. LSTM serves as the baseline.

| OPTIMIZATION CONFIGURATION        |                                                                    |
|-----------------------------------|--------------------------------------------------------------------|
| training epochs                   | 100                                                                |
| batch size                        | 64                                                                 |
| optimizer                         | Adam                                                               |
| scheduler to adjust learning rate | cosineannealing                                                    |
| initial learning rate             | 2.00E-05                                                           |
| L2 regularization weight          | 1.00E-04                                                           |
| Deep Learning Server              | Supermicro SuperServer 4028GR-TR                                   |
| GPU                               | NVIDIA Tesla® V100 with 32 GB per GPU (256 GB total) of GPU memory |
| CPU                               | Intel Xeon E5-2650 v4 2.2 GHz 12-Core (48-core total)              |

Table S4: Optimization related configuration
